# Supplementary material for: Germline Genetic Testing and Survival Outcomes Among Children With Rhabdomyosarcoma: A Report From the Children’s Oncology Group
Source: PubMed Central journal article supplement (PMC10979319; doi:10.1001/jamanetworkopen.2024.4170), 2024-03-28
Supplement: jamanetwopen-e244170-s001.pdf [file jamanetwopen-e244170-s001.pdf]

## Supplemental Online Content

Martin-Giacalone BA, Li H, Scheurer ME, et al. Germline genetic testing and survival outcomes among children with rhabdomyosarcoma: a report from the Children's Oncology Group. *JAMA Netw Open*. 2024;7(3):e244170. doi:10.1001/jamanetworkopen.2024.4170

### eMethods

**eTable 1.** Cancer Predisposition Genes as Evaluated in Li et al

**eTable 2.** Outcome of Individuals With Rhabdomyosarcoma who Harbored Cancer-Predisposition Variants

**eFigure.** Cox Proportional Hazards Regression Models of Cancer Predisposition Variant (CPV) Status by Specific Genes

This supplemental material has been provided by the authors to give readers additional information about their work.

## eMethods

### Population

Demographic, phenotypic, and outcome data were collected through the COG D9902 soft tissue sarcoma biobanking protocol. COG central pathology review was required for individuals enrolled on front-line COG RMS therapeutic study; in cases where patients were not planning to be enrolled on a RMS therapeutic study, the enrolling institution made the histological diagnosis. Data collected by self-report included sex (female, male), race (American Indian/Alaska Native, Asian, Black or African American, Native Hawaiian/Pacific Islander, White, unknown or not reported), and ethnicity (Hispanic, Not Hispanic, or unknown or not reported). These data were collected to assess the association of demographic characteristics with the outcome of interest. Clinical data on age at diagnosis (continuous), stage (1, 2, 3, 4), histological subtype (alveolar, botryoid, embryonal, mixed RMS, RMS not otherwise specified, RMS with ganglionic differentiation, spindle cell), primary site, and PAX3/7::FOXO1 fusion status (fusion-positive RMS, fusion-negative RMS, unknown) were collected by the clinical trial investigator. For this study, we recoded case histology that was not ERMS or ARMS; botryoid (n=38) or spindle cell RMS (n=30) were coded as ERMS, while mixed RMS, RMS with ganglionic differentiation, and RMS not otherwise specified were coded as “other.”

Of the 615 patients enrolled in the initial study, 300 patients were co-enrolled on one or more of the following COG therapeutic studies: ARST0921, ARST08P1, ARST0531, ARST0431, ARST0331, D9803, D9802, and D9602.

### Statistical analysis

In multivariable Cox proportional hazards regression, covariates of interest included: age at diagnosis (categorical variable with groups <1, 1-9, and  $\geq 10$  years), sex assigned at birth (male, female), primary site, tumor histology (ARMS, ERMS, and other), tumor stage (categorical variable with groups 1, 2, 3, and 4; includes primary site, tumor size, regional nodal status, and presence of metastases), and the top five principal components (to control for population stratification), which were derived from exome data. We tested all covariates in a backwards, stepwise selection method to determine variables that were significantly associated with RMS outcome at the  $P < 0.05$  level. Based on our hypothesis, the initial model included CPV status and allowed for the addition of all covariates. We removed the variables sex assigned at birth and primary site from the multivariable model as they did not significantly change the effect estimate upon addition/removal from the model. Confidence intervals were estimated using the log-log survival function. All Cox models met the proportional hazards assumptions based on assessing Schoenfeld residuals or a time transformation ( $\alpha = 0.05$ ).

**eTable 1.** Cancer Predisposition Genes as Evaluated in Li et al.<sup>a</sup>

| <b>RMS predisposition genes (n=24)</b> | <b>Additional cancer predisposition genes (n=39)</b> |
|----------------------------------------|------------------------------------------------------|
| <i>BRAF</i>                            | <i>ALK</i>                                           |
| <i>CBL</i>                             | <i>APC</i>                                           |
| <i>CDKN1C</i>                          | <i>BAP1</i>                                          |
| <i>CHEK2</i>                           | <i>BMPR1A</i>                                        |
| <i>CREBBP</i>                          | <i>BRCA1</i>                                         |
| <i>DICER1</i>                          | <i>BRCA2</i>                                         |
| <i>HRAS</i>                            | <i>CDC73</i>                                         |
| <i>KRAS</i>                            | <i>CDH1</i>                                          |
| <i>MAP2K1</i>                          | <i>CDK4</i>                                          |
| <i>MAP2K2</i>                          | <i>CDKN2A</i>                                        |
| <i>MLH1</i>                            | <i>CEBPA</i>                                         |
| <i>MSH2</i>                            | <i>EPCAM</i>                                         |
| <i>MSH6</i>                            | <i>FH</i>                                            |
| <i>NF1</i>                             | <i>GATA2</i>                                         |
| <i>NRAS</i>                            | <i>MAX</i>                                           |
| <i>PMS2</i>                            | <i>MEN1</i>                                          |
| <i>PTCH1</i>                           | <i>NF2</i>                                           |
| <i>PTPN11</i>                          | <i>PALB2</i>                                         |
| <i>RAF1</i>                            | <i>PAX5</i>                                          |
| <i>RIT1</i>                            | <i>PHOX2B</i>                                        |
| <i>SHOC2</i>                           | <i>PRKAR1A</i>                                       |
| <i>SOS1</i>                            | <i>PTEN</i>                                          |
| <i>SUFU</i>                            | <i>RB1</i>                                           |
| <i>TP53</i>                            | <i>RET</i>                                           |
|                                        | <i>RUNX1</i>                                         |
|                                        | <i>SDHA</i>                                          |
|                                        | <i>SDHAF2</i>                                        |
|                                        | <i>SDHB</i>                                          |
|                                        | <i>SDHC</i>                                          |
|                                        | <i>SDHD</i>                                          |
|                                        | <i>SMAD4</i>                                         |
|                                        | <i>SMARCA4</i>                                       |
|                                        | <i>SMARCB1</i>                                       |
|                                        | <i>STK11</i>                                         |
|                                        | <i>TMEM127</i>                                       |
|                                        | <i>TSC1</i>                                          |
|                                        | <i>TSC2</i>                                          |
|                                        | <i>VHL</i>                                           |
|                                        | <i>WT1</i>                                           |

<sup>a</sup> Li H, Sisoudiya SD, Martin-Giacalone BA, et al: Germline Cancer Predisposition Variants in Pediatric Rhabdomyosarcoma: A Report From the Children's Oncology Group. *J Natl Cancer Inst* 113:875–883, 2021

**eTable 2.** Outcome of Individuals With Rhabdomyosarcoma Who Harbored Cancer-Predisposition Variants

| Gene and cancer-predisposition variant            | ClinVar status | ClinVar Variation ID | Patient tumor histology | Patient age at diagnosis (years) | Sex    | Primary site                | Event type                 |
|---------------------------------------------------|----------------|----------------------|-------------------------|----------------------------------|--------|-----------------------------|----------------------------|
| <i>RMS-associated cancer-predisposition genes</i> |                |                      |                         |                                  |        |                             |                            |
| <i>TP53</i><br>(ENST00000269305.4)                |                |                      |                         |                                  |        |                             |                            |
| c.892G>T (p.Glu298Ter)                            | P              | 93323                | ERMS                    | 1-9                              | Male   | Arm                         | Relapse/Progression, Death |
| c.818G>A (p.Arg273His)                            | P              | 12366                | ERMS                    | 1-9                              | Female | Thigh                       | No Event                   |
| c.794T>C (p.Leu265Pro)                            | P/LP           | 245777               | ARMS                    | 1-9                              | Male   | Nasopharynx (Parameningeal) | Death                      |
| c.743G>A (p.Arg248Gln)                            | P              | 12356                | ERMS                    | <1                               | Male   | Paraspinal                  | No Event                   |
| c.730G>A (p.Gly244Ser)                            | P              | 376600               | ERMS                    | 1-9                              | Female | Middle Ear                  | Relapse/Progression, Death |
| c.560-1G>C                                        | P              | 492748               | ERMS                    | 1-9                              | Female | Thigh                       | Relapse/Progression        |
| c.473G>A (p.Arg158His)                            | P/LP           | 141963               | Other                   | 1-9                              | Female | Unknown                     | No Event                   |
| c.451C>T (p.Pro151Ser)                            | P/LP           | 12370                | ERMS                    | <1                               | Female | Scalp                       | No Event                   |
| c.451C>A (p.Pro151Thr)                            | P/LP           | 12369                | ERMS                    | 1-9                              | Male   | Unknown                     | Relapse/Progression, Death |
| c.375G>A (p.Thr125=)                              | P              | 177825               | ERMS                    | 1-9                              | Male   | Thigh                       | Second Malignancy, Death   |
| c.365_366del (p.Val122AspfsTer26)                 | P              | 127809               | ERMS                    | <1                               | Female | Bladder                     | Relapse/Progression, Death |
| <i>NF1</i> (NM_001042492.3)                       |                |                      |                         |                                  |        |                             |                            |
| c.1466A>G (p.Tyr489Cys)                           | P              | 354                  | ERMS                    | 1-9                              | Female | Peritoneum                  | No Event                   |
| c.2041C>T (p.Arg681Ter)                           | P              | 188280               | ERMS                    | 1-9                              | Female | Vagina                      | No Event                   |
| c.3520C>T (p.Gln1174Ter)                          | P              | 978806               | ERMS                    | 1-9                              | Male   | Orbit                       | No Event                   |
| c.3826C>T (p.Arg1276Ter)                          | P              | 237556               | ERMS                    | ≥10                              | Female | Cervix                      | Relapse/Progression, Death |
| c.4985G>A (p.Trp1662Ter)                          | P              | 573015               | ERMS                    | 1-9                              | Male   | Testis-Paratestis           | No Event                   |

| Gene and cancer-predisposition variant   | ClinVar status | ClinVar Variation ID | Patient tumor histology | Patient age at diagnosis (years) | Sex    | Primary site               | Event type                 |
|------------------------------------------|----------------|----------------------|-------------------------|----------------------------------|--------|----------------------------|----------------------------|
| <i>NF1</i> (NM_001042492.3)<br>continued |                |                      |                         |                                  |        |                            |                            |
| c.5305C>T (p.Arg1769Ter)                 | P              | 228381               | ERMS                    | <1                               | Male   | Shoulder girdle            | No Event                   |
| c.5609G>A (p.Arg1870Gln)                 | P              | 185354               | ERMS                    | 1-9                              | Male   | Pelvis, Site Indeterminate | No Event                   |
| c.6704+1G>T                              | P              | 547680               | ERMS                    | 1-9                              | Male   | Testis-Paratestis          | No Event                   |
| c.7159_7164del (p.Asn2387_Phe2388del)    | P/LP           | 220715               | ERMS                    | 1-9                              | Female | Pelvis, site indeterminate | Relapse/Progression, Death |
| <i>HRAS</i> (NM_005343.4)                |                |                      |                         |                                  |        |                            |                            |
| c.35G>C (p.Gly12Ala)                     | P              | 12603                | ERMS                    | 1-9                              | Female | Unknown                    | Relapse/Progression, Death |
| c.34G>A (p.Gly12Ser)                     | P              | 12602                | ERMS                    | 1-9                              | Male   | Pelvis, Site Indeterminate | Relapse/Progression, Death |
| c.34G>A (p.Gly12Ser)                     | P              | 12602                | ERMS                    | 1-9                              | Male   | Orbit                      | No Event                   |
| c.34G>A (p.Gly12Ser)                     | P              | 12602                | ERMS                    | 1-9                              | Female | Pelvis, site indeterminate | Relapse/Progression, Death |
| c.34G>A (p.Gly12Ser)                     | P              | 12602                | ERMS                    | 1-9                              | Male   | Abdominal wall             | Death                      |
| <i>CBL</i> (NM_005188.4):                |                |                      |                         |                                  |        |                            |                            |
| c.1259G>A (p.Arg420Gln)                  | P/LP           | 13810                | ERMS                    | 1-9                              | Female | Retroperitoneum            | Relapse/Progression        |
| c.1495C>T (p.Arg499Ter)                  | -              | -                    | ERMS                    | 1-9                              | Female | Retroperitoneum            | No Event                   |
| <i>DICER1</i> (NM_030621.4)              |                |                      |                         |                                  |        |                            |                            |
| c.2026C>T (p.Arg676Ter)                  | P              | 242054               | ERMS                    | 1-9                              | Female | Eye                        | No event                   |
| <i>MSH2</i> (NM_000251.3)                |                |                      |                         |                                  |        |                            |                            |
| c.1147C>T (p.Arg383Ter)                  | P              | 90554                | ARMS                    | ≥10                              | Female | Unknown                    | Death                      |
| <i>PMS2</i> (NM_000535.7)                |                |                      |                         |                                  |        |                            |                            |
| c.2404C>T (p.Arg802Ter)                  | P              | 9237                 | ERMS                    | 1-9                              | Female | Cheek                      | Relapse/Progression, Death |

| Gene and cancer-predisposition variant   | ClinVar status | ClinVar Variation ID | Patient tumor histology | Patient age at diagnosis (years) | Sex    | Primary site               | Event type                 |
|------------------------------------------|----------------|----------------------|-------------------------|----------------------------------|--------|----------------------------|----------------------------|
| <i>PTCH1</i> (NM_001083602.3)            |                |                      |                         |                                  |        |                            |                            |
| c.93C>G                                  | LP             | 978808               | Other                   | 1-9                              | Male   | Pelvis, site indeterminate | No event                   |
| <b>Other cancer-predisposition genes</b> |                |                      |                         |                                  |        |                            |                            |
| <i>BRCA2</i> (NM_000059.4)               |                |                      |                         |                                  |        |                            |                            |
| c.462_463del (p.Asp156Ter)               | P              | 51684                | ERMS                    | <1                               | Female | Bladder                    | No Event                   |
| c.3103G>T (p.Glu1035Ter)                 | P              | 51400                | ERMS                    | 1-9                              | Male   | Retroperitoneum            | No Event                   |
| c.3599_3600del (p.Cys1200Ter)            | P              | 51493                | ERMS                    | 1-9                              | Female | Orbit                      | No Event                   |
| c.3847_3848del (p.Val1283LysfsTer2)      | P              | 37859                | ARMS                    | ≥10                              | Male   | Paranasal Sinus            | Relapse/Progression, Death |
| c.7133C>G (p.Ser2378Ter)                 | P              | 38085                | ERMS                    | 1-9                              | Male   | Middle Ear                 | No Event                   |
| c.7857G>A (p.Trp2619Ter)                 | P              | 38122                | ARMS                    | 1-9                              | Female | Unknown                    | No Event                   |
| <i>SDHA</i> (NM_004168.4)                |                |                      |                         |                                  |        |                            |                            |
| c.2T>G (p.Met1Arg)                       | P/LP           | 422382               | ERMS                    | 1-9                              | Male   | Testis-Paratestis          | No event                   |
| c.91C>T (p.Arg31Ter)                     | P/LP           | 142601               | ARMS                    | ≥10                              | Female | Unknown                    | No event                   |
| <i>ALK</i> (NM_004304.5)                 |                |                      |                         |                                  |        |                            |                            |
| c.4297del (p.Glu1433ArgfsTer44)          | VUS            | 1346971              | ERMS                    | 1-9                              | Male   | Other head & neck          | Relapse/Progression        |
| <i>BRCA1</i> (NM_007300.4)               |                |                      |                         |                                  |        |                            |                            |
| c.5240_5243del (p.Arg1747LysfsTer3)      | P              | 37644                | ERMS                    | 1-9                              | Female | Other head & neck          | No event                   |
| <i>SDHC</i> (NM_003001.5)                |                |                      |                         |                                  |        |                            |                            |
| c.386G>A (p.Trp129Ter)                   | P              | 978229               | ERMS                    | 1-9                              | Male   | Testis-Paratestis          | No event                   |

<sup>a</sup> Variants are reported using genome assembly GRCh37/hg19

<sup>b</sup> P/LP, pathogenic or likely pathogenic

<sup>c</sup> VUS, variant of uncertain significance

<sup>d</sup> ERMS, embryonal rhabdomyosarcoma; ARMS, alveolar rhabdomyosarcoma

<sup>e</sup> Median follow-up time for individuals with a cancer predisposition variant was 4.88 years (interquartile range: 1.24-7.56 years)

**eFigure.** Cox Proportional Hazards Regression Models of Cancer Predisposition Variant (CPV) Status by Specific Genes

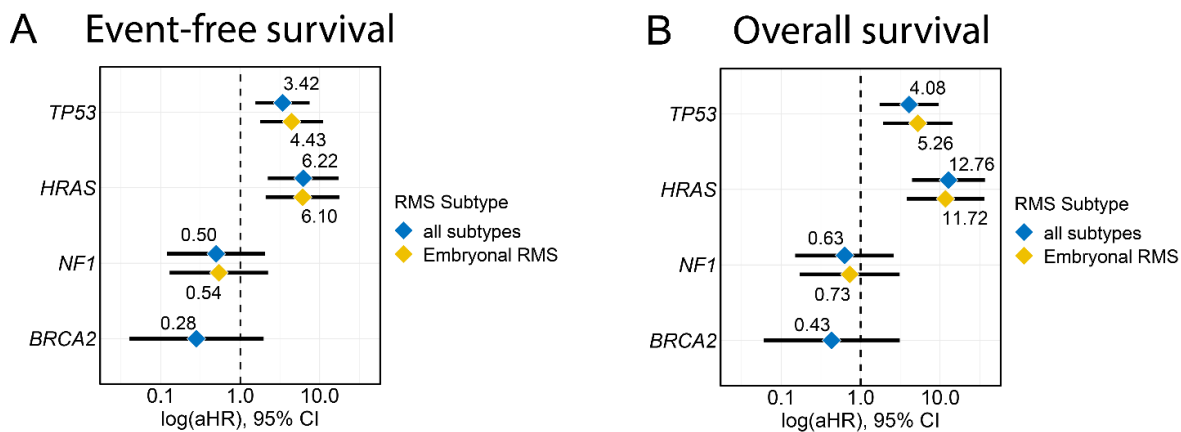

Adjusted hazard ratios (aHR) and 95% confidence intervals for RMS (A) event-free survival and (B) overall survival are plotted by specific genes and subtype group. RMS subtype group included either all subtypes (alveolar, embryonal, and other/not otherwise specified) or only embryonal RMS (ERMS) cases. No individuals with ERMS carried a CPV in BRCA2. Plot labels for aHR reflect the original aHR values, while the x-axis scale represents the log of the aHR.
