# Supplementary material for: Germline Genetic Testing and Survival Outcomes Among Children With Rhabdomyosarcoma: A Report From the Children’s Oncology Group
Source: PubMed Central journal article supplement (PMC10979319; doi:10.1001/jamanetworkopen.2024.4170), 2024-03-28
Supplement: jamanetwopen-e244170-s002.pdf [file jamanetwopen-e244170-s002.pdf]

## Data Sharing Statement

Martin-Giacalone. Germline Genetic Testing and Survival Outcomes Among Children With Rhabdomyosarcoma. *JAMA Netw Open*. Published March 28, 2024.

doi:10.1001/jamanetworkopen.2024.4170

### Data

**Data available:** Yes

**Data types:** Deidentified participant data

**How to access data:** [https://www.ncbi.nlm.nih.gov/projects/gap/cgi-bin/study.cgi?study\\_id=phs003192.v1.p1](https://www.ncbi.nlm.nih.gov/projects/gap/cgi-bin/study.cgi?study_id=phs003192.v1.p1)

**When available:** With publication

### Supporting Documents

**Document types:** None

### Additional Information

**Who can access the data:** Researchers whose proposed use of the data has been approved.

**Types of analyses:** Genetic analyses.

**Mechanisms of data availability:** Data are available through dbGaP.
